# Supplementary material for: Conformational dynamics and asymmetry in multimodal inhibition of membrane-bound pyrophosphatases
Source: eLife. 2025 Nov 13;13:RP102288. doi: 10.7554/eLife.102288 (PMC12614893; doi:10.7554/eLife.102288)
Supplement: Supplementary file 2. [file elife-102288-supp2.docx]

Supplementary File 2. Structural alignments between chains of different TmPPase structures

| Chain | ETDA:ETDB | 4AV3A:4AV3B | ETDA:4AV3A | ETDB:4AV3B | ETDA:4AV3B | ETDB:4AV3A |
| --- | --- | --- | --- | --- | --- | --- |
| Ca RMSD (Å) | 1.44 | 0.39 | 0.72 | 0.94 | 0.70 | 0.98 |
| Chain | **ZLDA:ZLDB** | **5LZQA:5LZQB** | **ZLDA:5LZQA** | **ZLDB:5LZQB** | **ZLDA: 5LZQB** | **ZLDB:5LZQA** |
| Ca RMSD (Å) | 0.51 | 0.21 | 0.72 | 0.72 | 0.74 | 0.69 |
| Chain | **ZLDA:ZLDC** | **ZLDA:ZLDD** | **ZLDC:ZLDD** | **ZLDB:ZLDD** | **ZLDB:ZLDC** |  |
| Ca RMSD (Å) | 0.58 | 0.68 | 0.90 | 0.61 | 0.66 |  |
